# Supplementary material for: Catalytic transfer hydrogenation of levulinic acid to γ-valerolactone over a bifunctional tin catalyst
Source: Royal Society of Chemistry journal article supplement (doi:10.1039/c6ra25594a), 2017-01-01
Supplement: c6ra25594a1.pdf [file c6ra25594a1.pdf]

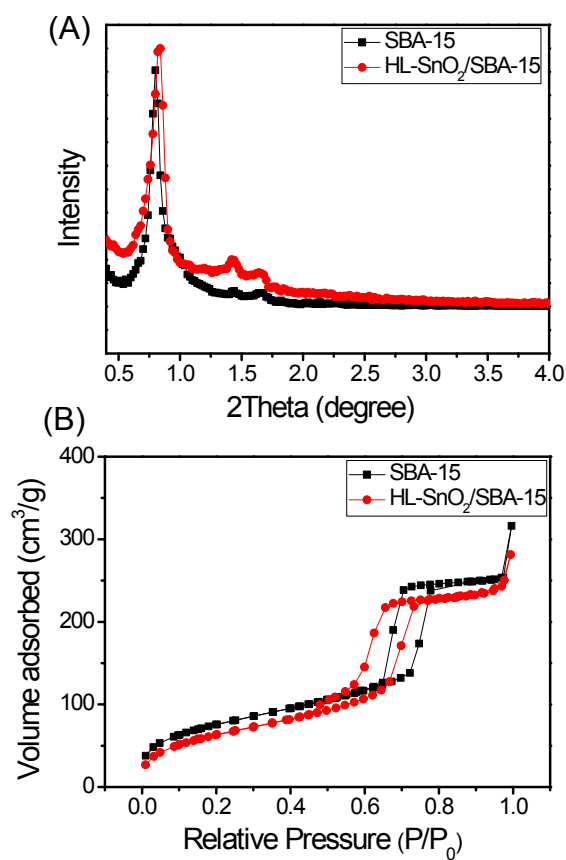

Figure S1. (A) The XRD patterns and (B) N<sub>2</sub> sorption isotherms of SBA-15, HL-SnO<sub>2</sub>/SBA-15.

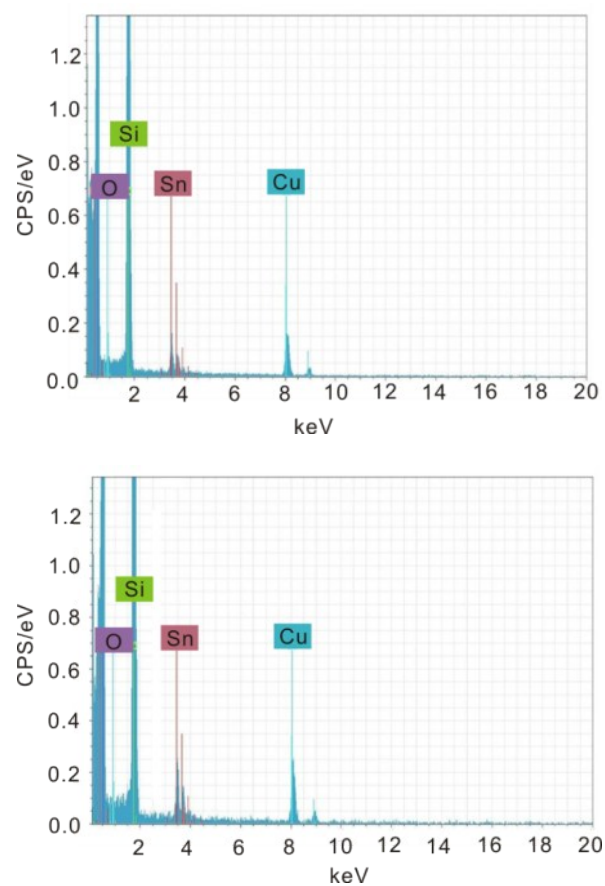

Figure S2. Energy dispersive spectra (EDS) of randomly selected regions on  $\text{SnO}_2/\text{SBA-15}$ .

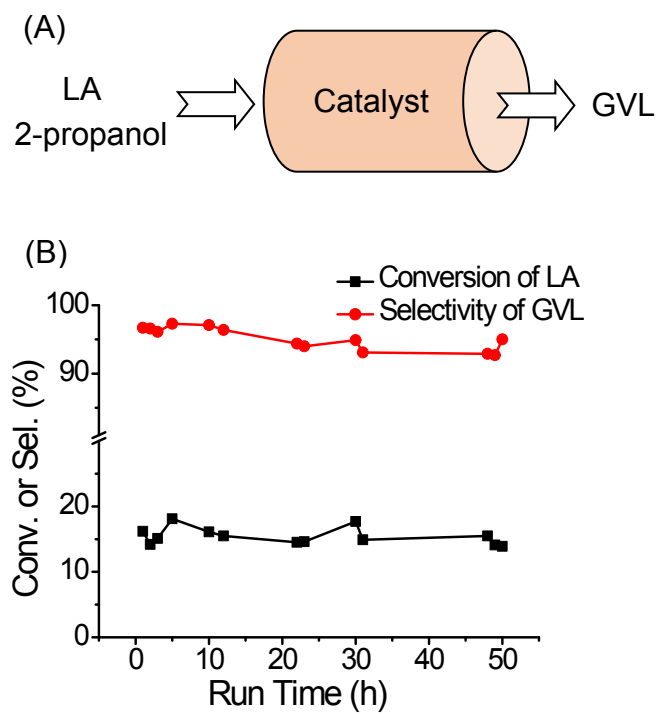

Figure S3. (A) Scheme of the fixed-bed reactor for producing GVL in a continuous system; (B) Dependence of LA conversion and GVL selectivity on time in the fixed-bed reactor. Reaction temperature at 100 °C, reactor volume at 10 ml, 0.2 g of SnO<sub>2</sub>/SBA-15, 2.0 wt% LA in 2-propanol solution, 0.2 ml/min N<sub>2</sub>.
